# Supplementary material
Source: publisher figshare collection journal article supplement (https://tandf.figshare.com/ndownloader/files/16235378)

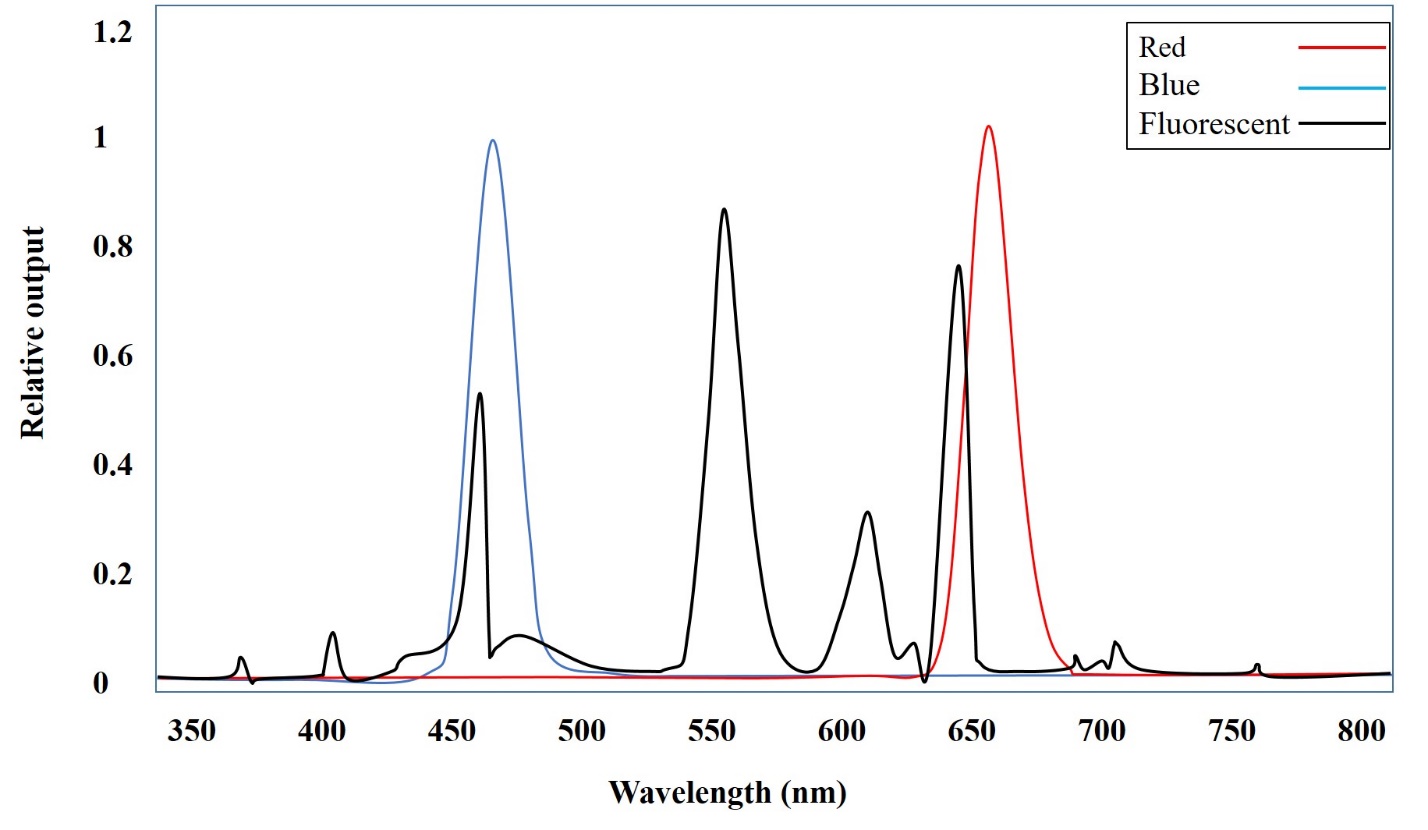


Supplementary data 1: The spectrum of red, blue and fluorescent lights

Supplement: Supplementary file 1 [file 16235378]
